# Supplementary material for: Secretome Analysis of the Pine Wood Nematode Bursaphelenchus xylophilus Reveals the Tangled Roots of Parasitism and Its Potential for Molecular Mimicry
Source: PLoS One. 2013 Jun 21;8(6):e67377. doi: 10.1371/journal.pone.0067377 (PMC3689755; doi:10.1371/journal.pone.0067377)
Supplement: Table S4 — The list of clusters of orthologous groups and genes shared between the secretome of Bursaphelenchus xylophilus (Bx) and Meloidogyne incognita (Mi). (XLS) [file pone.0067377.s008.xls]

## Sheet: Sheet1
Clusters of orthoMCL groups	Genes in each clusters
ORTHOMCL13(8 genes,2 taxa):	BUX.c00054.1(Bx) BUX.c08741.1(Bx) BUX.s01066.1(Bx) BUX.s01066.3(Bx) BUX.s01066.8(Bx) BUX.s01505.4(Bx) BUX.s01505.5(Bx) CL737Contig1_1_AA(Mi)
ORTHOMCL70(4 genes,2 taxa):	215m02r1.1_1_AA(Mi) BUX.s01254.333(Bx) CL2084Contig1_1_AA(Mi) MI00148(Mi)
ORTHOMCL71(4 genes,2 taxa):	220d23r1.1_1_AA(Mi) BUX.s00460.341(Bx) BUX.s01259.21(Bx) BUX.s01661.75(Bx)
ORTHOMCL72(4 genes,2 taxa):	BUX.s00036.30(Bx) BUX.s01109.453(Bx) BUX.s01145.147(Bx) CL78Contig1_1_AA(Mi)
ORTHOMCL78(4 genes,2 taxa):	BUX.s00579.226(Bx) BUX.s01109.465(Bx) BUX.s01653.34(Bx) CL2605Contig1_1_AA(Mi)
ORTHOMCL79(4 genes,2 taxa):	BUX.s00579.61(Bx) BUX.s01145.19(Bx) BUX.s01435.2(Bx) CL1347Contig1_1_AA(Mi)
ORTHOMCL80(4 genes,2 taxa):	BUX.s01144.141(Bx) BUX.s01518.52(Bx) MI02465(Mi) MI06351(Mi)
ORTHOMCL148(3 genes,2 taxa):	203i02r1.1_1_AA(Mi) 204h01r1.1_1_AA(Mi) BUX.s00116.875(Bx)
ORTHOMCL150(3 genes,2 taxa):	210o05C1.1_1_AA(Mi) BUX.s00579.352(Bx) BUX.s01337.51(Bx)
ORTHOMCL151(3 genes,2 taxa):	226d21r1.1_1_AA(Mi) BUX.s01092.114(Bx) BUX.s01198.7(Bx)
ORTHOMCL153(3 genes,2 taxa):	BUX.s00116.24(Bx) BUX.s00579.272(Bx) MI01934(Mi)
ORTHOMCL155(3 genes,2 taxa):	BUX.s00252.14(Bx) CL2Contig16_1_AA(Mi) CL2Contig2_1_AA(Mi)
ORTHOMCL159(3 genes,2 taxa):	BUX.s00351.324(Bx) BUX.s00351.325(Bx) CL673Contig1_1_AA(Mi)
ORTHOMCL160(3 genes,2 taxa):	BUX.s00351.446(Bx) CL999Contig1_1_AA(Mi) MI01658(Mi)
ORTHOMCL161(3 genes,2 taxa):	BUX.s00351.455(Bx) BUX.s01438.76(Bx) CL107Contig1_1_AA(Mi)
ORTHOMCL163(3 genes,2 taxa):	BUX.s00391.1(Bx) BUX.s00713.1138(Bx) MI00994(Mi)
ORTHOMCL171(3 genes,2 taxa):	BUX.s00647.163(Bx) BUX.s01038.53(Bx) MI02091(Mi)
ORTHOMCL174(3 genes,2 taxa):	BUX.s00713.45(Bx) BUX.s01653.149(Bx) CL100Contig1_1_AA(Mi)
ORTHOMCL176(3 genes,2 taxa):	BUX.s00974.24(Bx) BUX.s01653.360(Bx) CL2805Contig1_1_AA(Mi)
ORTHOMCL184(3 genes,2 taxa):	BUX.s01226.18(Bx) CL2812Contig1_1_AA(Mi) MI01923(Mi)
ORTHOMCL186(3 genes,2 taxa):	BUX.s01513.170(Bx) BUX.s01513.234(Bx) gi|17562198|ref|NP_503467.1|(Mi)
ORTHOMCL187(3 genes,2 taxa):	BUX.s01653.404(Bx) BUX.s01656.92(Bx) gi|5833216|gb|AAD53409.1|(Mi)
ORTHOMCL298(2 genes,2 taxa):	14990.m07633(Mi) BUX.s01141.51(Bx)
ORTHOMCL305(2 genes,2 taxa):	14992.m10966(Mi) BUX.s00466.132(Bx)
ORTHOMCL307(2 genes,2 taxa):	14992.m11170(Mi) BUX.s01143.217(Bx)
ORTHOMCL317(2 genes,2 taxa):	203n01r1.1_1_AA(Mi) BUX.s00713.716(Bx)
ORTHOMCL318(2 genes,2 taxa):	203p11r1.1_1_AA(Mi) BUX.s01513.380(Bx)
ORTHOMCL319(2 genes,2 taxa):	205o21r1.1_1_AA(Mi) BUX.s00139.155(Bx)
ORTHOMCL320(2 genes,2 taxa):	206n08r1.1_1_AA(Mi) BUX.s01438.39(Bx)
ORTHOMCL321(2 genes,2 taxa):	207a11C1.1_1_AA(Mi) BUX.s01147.119(Bx)
ORTHOMCL322(2 genes,2 taxa):	208l10r1.1_1_AA(Mi) BUX.s00713.20(Bx)
ORTHOMCL323(2 genes,2 taxa):	210d13r1.1_1_AA(Mi) BUX.s01198.15(Bx)
ORTHOMCL324(2 genes,2 taxa):	211k05r1.1_1_AA(Mi) BUX.s00579.439(Bx)
ORTHOMCL325(2 genes,2 taxa):	214g02r1.1_1_AA(Mi) BUX.s00713.518(Bx)
ORTHOMCL326(2 genes,2 taxa):	215a24r1.1_1_AA(Mi) BUX.s00055.79(Bx)
ORTHOMCL327(2 genes,2 taxa):	218g22r1.1_1_AA(Mi) BUX.s00128.30(Bx)
ORTHOMCL328(2 genes,2 taxa):	218l10C1.1_1_AA(Mi) BUX.s01644.8(Bx)
ORTHOMCL332(2 genes,2 taxa):	BUX.s00036.14(Bx) CL2507Contig1_1_AA(Mi)
ORTHOMCL334(2 genes,2 taxa):	BUX.s00036.44(Bx) CL1707Contig1_1_AA(Mi)
ORTHOMCL336(2 genes,2 taxa):	BUX.s00055.114(Bx) MI08334(Mi)
ORTHOMCL337(2 genes,2 taxa):	BUX.s00055.131(Bx) MH02927(Mi)
ORTHOMCL338(2 genes,2 taxa):	BUX.s00055.212(Bx) CL1426Contig1_1_AA(Mi)
ORTHOMCL339(2 genes,2 taxa):	BUX.s00055.217(Bx) CL109Contig1_1_AA(Mi)
ORTHOMCL340(2 genes,2 taxa):	BUX.s00055.288(Bx) MJ00925(Mi)
ORTHOMCL341(2 genes,2 taxa):	BUX.s00055.354(Bx) MJ00281(Mi)
ORTHOMCL343(2 genes,2 taxa):	BUX.s00083.54(Bx) CL2396Contig1_1_AA(Mi)
ORTHOMCL344(2 genes,2 taxa):	BUX.s00083.58(Bx) CL333Contig1_1_AA(Mi)
ORTHOMCL346(2 genes,2 taxa):	BUX.s00116.187(Bx) CL7Contig2_1_AA(Mi)
ORTHOMCL347(2 genes,2 taxa):	BUX.s00116.199(Bx) MI02218(Mi)
ORTHOMCL349(2 genes,2 taxa):	BUX.s00116.351(Bx) MI04764(Mi)
ORTHOMCL350(2 genes,2 taxa):	BUX.s00116.358(Bx) MI01542(Mi)
ORTHOMCL351(2 genes,2 taxa):	BUX.s00116.389(Bx) MJ03828(Mi)
ORTHOMCL352(2 genes,2 taxa):	BUX.s00116.407(Bx) MI02588(Mi)
ORTHOMCL353(2 genes,2 taxa):	BUX.s00116.42(Bx) CL613Contig1_1_AA(Mi)
ORTHOMCL354(2 genes,2 taxa):	BUX.s00116.462(Bx) MI02098(Mi)
ORTHOMCL356(2 genes,2 taxa):	BUX.s00116.493(Bx) MP00119(Mi)
ORTHOMCL357(2 genes,2 taxa):	BUX.s00116.506(Bx) MI01032(Mi)
ORTHOMCL358(2 genes,2 taxa):	BUX.s00116.507(Bx) CL2981Contig1_1_AA(Mi)
ORTHOMCL359(2 genes,2 taxa):	BUX.s00116.721(Bx) CL2297Contig1_1_AA(Mi)
ORTHOMCL364(2 genes,2 taxa):	BUX.s00128.32(Bx) MI02399(Mi)
ORTHOMCL366(2 genes,2 taxa):	BUX.s00139.156(Bx) CL321Contig1_1_AA(Mi)
ORTHOMCL369(2 genes,2 taxa):	BUX.s00252.111(Bx) CL195Contig1_1_AA(Mi)
ORTHOMCL371(2 genes,2 taxa):	BUX.s00294.105(Bx) CL2887Contig1_1_AA(Mi)
ORTHOMCL372(2 genes,2 taxa):	BUX.s00294.126(Bx) CL843Contig1_1_AA(Mi)
ORTHOMCL373(2 genes,2 taxa):	BUX.s00294.39(Bx) CL3Contig3_1_AA(Mi)
ORTHOMCL374(2 genes,2 taxa):	BUX.s00294.53(Bx) CL1067Contig1_1_AA(Mi)
ORTHOMCL375(2 genes,2 taxa):	BUX.s00294.58(Bx) MI00222(Mi)
ORTHOMCL376(2 genes,2 taxa):	BUX.s00294.82(Bx) MP01239(Mi)
ORTHOMCL377(2 genes,2 taxa):	BUX.s00294.85(Bx) CL610Contig1_1_AA(Mi)
ORTHOMCL378(2 genes,2 taxa):	BUX.s00298.157(Bx) CL14Contig3_1_AA(Mi)
ORTHOMCL379(2 genes,2 taxa):	BUX.s00298.164(Bx) MH00967(Mi)
ORTHOMCL380(2 genes,2 taxa):	BUX.s00298.170(Bx) MH05001(Mi)
ORTHOMCL381(2 genes,2 taxa):	BUX.s00298.175(Bx) MI02122(Mi)
ORTHOMCL382(2 genes,2 taxa):	BUX.s00298.204(Bx) CL2549Contig1_1_AA(Mi)
ORTHOMCL383(2 genes,2 taxa):	BUX.s00298.221(Bx) MI01515(Mi)
ORTHOMCL384(2 genes,2 taxa):	BUX.s00298.231(Bx) CL441Contig1_1_AA(Mi)
ORTHOMCL388(2 genes,2 taxa):	BUX.s00351.180(Bx) MI04304(Mi)
ORTHOMCL389(2 genes,2 taxa):	BUX.s00351.22(Bx) CL19Contig2_1_AA(Mi)
ORTHOMCL390(2 genes,2 taxa):	BUX.s00351.270(Bx) CL406Contig1_1_AA(Mi)
ORTHOMCL391(2 genes,2 taxa):	BUX.s00351.293(Bx) MI03955(Mi)
ORTHOMCL392(2 genes,2 taxa):	BUX.s00351.376(Bx) CL1451Contig1_1_AA(Mi)
ORTHOMCL393(2 genes,2 taxa):	BUX.s00351.59(Bx) CL2Contig10_1_AA(Mi)
ORTHOMCL395(2 genes,2 taxa):	BUX.s00364.95(Bx) CL455Contig1_1_AA(Mi)
ORTHOMCL396(2 genes,2 taxa):	BUX.s00397.117(Bx) MI01047(Mi)
ORTHOMCL398(2 genes,2 taxa):	BUX.s00397.40(Bx) CL1413Contig1_1_AA(Mi)
ORTHOMCL399(2 genes,2 taxa):	BUX.s00397.59(Bx) CL886Contig1_1_AA(Mi)
ORTHOMCL400(2 genes,2 taxa):	BUX.s00422.189(Bx) MI06202(Mi)
ORTHOMCL402(2 genes,2 taxa):	BUX.s00422.276(Bx) CL47Contig1_1_AA(Mi)
ORTHOMCL403(2 genes,2 taxa):	BUX.s00422.4(Bx) CL224Contig1_1_AA(Mi)
ORTHOMCL404(2 genes,2 taxa):	BUX.s00422.563(Bx) MJ02223(Mi)
ORTHOMCL407(2 genes,2 taxa):	BUX.s00460.429(Bx) CL2864Contig1_1_AA(Mi)
ORTHOMCL408(2 genes,2 taxa):	BUX.s00460.492(Bx) CL210Contig1_1_AA(Mi)
ORTHOMCL409(2 genes,2 taxa):	BUX.s00460.504(Bx) XI01177(Mi)
ORTHOMCL410(2 genes,2 taxa):	BUX.s00465.16(Bx) CL2121Contig1_1_AA(Mi)
ORTHOMCL411(2 genes,2 taxa):	BUX.s00466.123(Bx) CL431Contig1_1_AA(Mi)
ORTHOMCL413(2 genes,2 taxa):	BUX.s00579.119(Bx) MA01689(Mi)
ORTHOMCL414(2 genes,2 taxa):	BUX.s00579.24(Bx) CL1Contig18_1_AA(Mi)
ORTHOMCL415(2 genes,2 taxa):	BUX.s00579.250(Bx) CL2931Contig1_1_AA(Mi)
ORTHOMCL417(2 genes,2 taxa):	BUX.s00579.462(Bx) CL604Contig1_1_AA(Mi)
ORTHOMCL418(2 genes,2 taxa):	BUX.s00579.463(Bx) cr01.Contig0.wum.390.1(Mi)
ORTHOMCL419(2 genes,2 taxa):	BUX.s00579.510(Bx) CL500Contig1_1_AA(Mi)
ORTHOMCL421(2 genes,2 taxa):	BUX.s00579.649(Bx) CL561Contig1_1_AA(Mi)
ORTHOMCL423(2 genes,2 taxa):	BUX.s00579.733(Bx) CL407Contig1_1_AA(Mi)
ORTHOMCL425(2 genes,2 taxa):	BUX.s00609.8(Bx) CL213Contig1_1_AA(Mi)
ORTHOMCL428(2 genes,2 taxa):	BUX.s00705.13(Bx) MI05568(Mi)
ORTHOMCL430(2 genes,2 taxa):	BUX.s00713.127(Bx) CL555Contig1_1_AA(Mi)
ORTHOMCL432(2 genes,2 taxa):	BUX.s00713.246(Bx) CL1135Contig1_1_AA(Mi)
ORTHOMCL433(2 genes,2 taxa):	BUX.s00713.290(Bx) CL212Contig1_1_AA(Mi)
ORTHOMCL434(2 genes,2 taxa):	BUX.s00713.422(Bx) CL701Contig1_1_AA(Mi)
ORTHOMCL437(2 genes,2 taxa):	BUX.s00713.790(Bx) MH03063(Mi)
ORTHOMCL440(2 genes,2 taxa):	BUX.s00713.842(Bx) MI01518(Mi)
ORTHOMCL441(2 genes,2 taxa):	BUX.s00713.996(Bx) CL29Contig1_1_AA(Mi)
ORTHOMCL442(2 genes,2 taxa):	BUX.s00725.15(Bx) MI00978(Mi)
ORTHOMCL445(2 genes,2 taxa):	BUX.s00789.28(Bx) GP01134(Mi)
ORTHOMCL446(2 genes,2 taxa):	BUX.s00789.29(Bx) MI02172(Mi)
ORTHOMCL447(2 genes,2 taxa):	BUX.s00862.18(Bx) MI00905(Mi)
ORTHOMCL448(2 genes,2 taxa):	BUX.s00974.35(Bx) MI01802(Mi)
ORTHOMCL449(2 genes,2 taxa):	BUX.s01038.142(Bx) CL2882Contig1_1_AA(Mi)
ORTHOMCL450(2 genes,2 taxa):	BUX.s01038.196(Bx) MC00909(Mi)
ORTHOMCL451(2 genes,2 taxa):	BUX.s01038.84(Bx) MI02078(Mi)
ORTHOMCL452(2 genes,2 taxa):	BUX.s01063.131(Bx) CL135Contig1_1_AA(Mi)
ORTHOMCL453(2 genes,2 taxa):	BUX.s01063.184(Bx) MI03461(Mi)
ORTHOMCL455(2 genes,2 taxa):	BUX.s01078.25(Bx) MI01739(Mi)
ORTHOMCL456(2 genes,2 taxa):	BUX.s01092.32(Bx) MI00527(Mi)
ORTHOMCL457(2 genes,2 taxa):	BUX.s01109.197(Bx) CL1630Contig1_1_AA(Mi)
ORTHOMCL458(2 genes,2 taxa):	BUX.s01109.272(Bx) CL633Contig1_1_AA(Mi)
ORTHOMCL459(2 genes,2 taxa):	BUX.s01109.287(Bx) CL983Contig1_1_AA(Mi)
ORTHOMCL460(2 genes,2 taxa):	BUX.s01109.343(Bx) cr01.Contig10.wum.49.1(Mi)
ORTHOMCL461(2 genes,2 taxa):	BUX.s01109.415(Bx) CL124Contig1_1_AA(Mi)
ORTHOMCL462(2 genes,2 taxa):	BUX.s01109.447(Bx) CL114Contig1_1_AA(Mi)
ORTHOMCL463(2 genes,2 taxa):	BUX.s01109.462(Bx) CL1191Contig1_1_AA(Mi)
ORTHOMCL466(2 genes,2 taxa):	BUX.s01109.624(Bx) MI02513(Mi)
ORTHOMCL467(2 genes,2 taxa):	BUX.s01109.85(Bx) CL651Contig1_1_AA(Mi)
ORTHOMCL468(2 genes,2 taxa):	BUX.s01141.83(Bx) CL68Contig1_1_AA(Mi)
ORTHOMCL469(2 genes,2 taxa):	BUX.s01141.92(Bx) CL254Contig1_1_AA(Mi)
ORTHOMCL470(2 genes,2 taxa):	BUX.s01142.16(Bx) MI00037(Mi)
ORTHOMCL472(2 genes,2 taxa):	BUX.s01143.185(Bx) CL1Contig15_1_AA(Mi)
ORTHOMCL473(2 genes,2 taxa):	BUX.s01143.30(Bx) gi|39582247|emb|CAE64198.1|(Mi)
ORTHOMCL474(2 genes,2 taxa):	BUX.s01143.61(Bx) CL2910Contig1_1_AA(Mi)
ORTHOMCL476(2 genes,2 taxa):	BUX.s01144.301(Bx) CL1662Contig1_1_AA(Mi)
ORTHOMCL477(2 genes,2 taxa):	BUX.s01144.313(Bx) CL53Contig1_1_AA(Mi)
ORTHOMCL478(2 genes,2 taxa):	BUX.s01144.316(Bx) CL578Contig1_1_AA(Mi)
ORTHOMCL479(2 genes,2 taxa):	BUX.s01145.5(Bx) CL41Contig1_1_AA(Mi)
ORTHOMCL482(2 genes,2 taxa):	BUX.s01268.80(Bx) MI01648(Mi)
ORTHOMCL483(2 genes,2 taxa):	BUX.s01281.409(Bx) MH09264(Mi)
ORTHOMCL484(2 genes,2 taxa):	BUX.s01281.46(Bx) CL174Contig1_1_AA(Mi)
ORTHOMCL485(2 genes,2 taxa):	BUX.s01288.20(Bx) CL1096Contig1_1_AA(Mi)
ORTHOMCL486(2 genes,2 taxa):	BUX.s01304.1(Bx) CL164Contig1_1_AA(Mi)
ORTHOMCL487(2 genes,2 taxa):	BUX.s01337.12(Bx) MI02284(Mi)
ORTHOMCL488(2 genes,2 taxa):	BUX.s01337.123(Bx) CL2824Contig1_1_AA(Mi)
ORTHOMCL491(2 genes,2 taxa):	BUX.s01513.146(Bx) CL2282Contig1_1_AA(Mi)
ORTHOMCL492(2 genes,2 taxa):	BUX.s01513.295(Bx) CL383Contig1_1_AA(Mi)
ORTHOMCL493(2 genes,2 taxa):	BUX.s01513.325(Bx) MI06174(Mi)
ORTHOMCL494(2 genes,2 taxa):	BUX.s01513.39(Bx) CL846Contig1_1_AA(Mi)
ORTHOMCL495(2 genes,2 taxa):	BUX.s01518.107(Bx) CL110Contig1_1_AA(Mi)
ORTHOMCL496(2 genes,2 taxa):	BUX.s01518.126(Bx) MH04679(Mi)
ORTHOMCL497(2 genes,2 taxa):	BUX.s01518.58(Bx) CL315Contig1_1_AA(Mi)
ORTHOMCL498(2 genes,2 taxa):	BUX.s01644.5(Bx) CL1833Contig1_1_AA(Mi)
ORTHOMCL499(2 genes,2 taxa):	BUX.s01653.225(Bx) CL928Contig1_1_AA(Mi)
ORTHOMCL500(2 genes,2 taxa):	BUX.s01653.246(Bx) CL145Contig1_1_AA(Mi)
ORTHOMCL501(2 genes,2 taxa):	BUX.s01653.260(Bx) CL623Contig1_1_AA(Mi)
ORTHOMCL502(2 genes,2 taxa):	BUX.s01653.410(Bx) CL1120Contig1_1_AA(Mi)
ORTHOMCL504(2 genes,2 taxa):	BUX.s01653.76(Bx) PP00360(Mi)
ORTHOMCL505(2 genes,2 taxa):	BUX.s01653.98(Bx) CL1656Contig1_1_AA(Mi)
ORTHOMCL506(2 genes,2 taxa):	BUX.s01656.18(Bx) CL2889Contig1_1_AA(Mi)
ORTHOMCL507(2 genes,2 taxa):	BUX.s01661.65(Bx) CL1779Contig1_1_AA(Mi)
ORTHOMCL508(2 genes,2 taxa):	BUX.s01662.87(Bx) MI01755(Mi)
